# Supplementary material for: The development of a novel bio-based corrosion inhibitor: using biomass-derived 5-hydroxymethylfurfural (5-HMF) as a starting material
Source: Royal Society of Chemistry journal article supplement (doi:10.1039/d3ra08240g), 2024-01-01
Supplement: d3ra08240g1.pdf [file d3ra08240g1.pdf]

# **The Development of a Novel Bio-based Corrosion Inhibitor: Using Biomass-Derived 5-Hydroxymethylfurfural (5-HMF) as Starting Materials**

Kexin Liu<sup>a#</sup>, Ping Li<sup>a#</sup>, Xia Li<sup>b</sup>, Wei Zhang<sup>c</sup>, Jiawei Zou<sup>a</sup>, Yuan Liu<sup>a</sup>, Pengyu Li<sup>a</sup>, Haitao Cui<sup>a</sup>, Yu Yang<sup>a\*</sup>, Wenying Ai<sup>a\*</sup>

<sup>a</sup> School of Material and Chemical Engineering, Zhongyuan University of Technology, Zhengzhou, Henan Province 450007, People's Republic of China.

<sup>b</sup> Department of Pharmacy, Logistics University of People's Armed Police Forces, Tianjin Key Laboratory for Prevention and Control of Occupational and Environmental Hazard, Tianjin, 300309, China.

<sup>c</sup> Zhejiang Sugar Energy Technologyco., Ltd. A1-6, East District, Ningbo New Material Innovation Center, High-tech Zone, Ningbo City, China.

## **Contents**

Section A. Materials and Methods

Section B. Synthetic Procedures

Section C. Supporting Figures

Section D. Supporting Tables

Section E. <sup>1</sup>H NMR, <sup>13</sup>C NMR and HRMS Spectra of the bio-based corrosion inhibitors

Section F. Copies of NMR Spectra

## Section A. Materials and Methods

Deuterated solvents were obtained from Cambridge Isotope Laboratories. Other routine chemicals were purchased from commercial suppliers with purity >95% and used without further purification. High-resolution accurate mass measurements (HRMS) were generated by using Agilent Technologies instrument. Nuclear magnetic resonance spectra ( $^1\text{H}$  NMR and  $^{13}\text{C}$  NMR) were recorded on a Bruker 400 MHz spectrometer. Referring to deuterated solvents, chemical changes are reported in ppm.

## Section B. Synthetic Procedures

N,N-dimethylhexadecan-1-amine, acetonitrile, and  $\text{SOCl}_2$  were purchased from Heowns. 5-Hydroxymethylfurfural was purchased from Zhejiang Sugar Energy Technology Co., Ltd.. All the other solvents were purchased from Heowns and used as received without further purification.

### The synthetic procedure of 5-CMF

The important intermediate 5-CMF was prepared from 5-HMF (1g, 8 mmol) through a substitution step. To the solution of 5-HMF in 1,2-dichloroethane (35 mL), was added con. HCl (20 mL) dropwise at 0 °C. And then the solution was stirred at room temperature for 12 h. The reaction was quenched by water (100 mL). The organic phase was dried by  $\text{Na}_2\text{SO}_4$ , and then concentrated in vacuum to give the crude product **1a**, which can be used directly in the next step.

### The synthetic procedure of target product Furylalkonium chlorid

To the solution of **1a** (1g, 772 $\mu\text{l}$ , 7mmol) in acetonitrile, was added N,N-dimethylhexadecan-1-amine at room temperature, and then the reaction was stirred at 80 °C for 1h. After that, the solution was concentrated directly to generate the crude product, which was subjected to column chromatography to give the target bio-based corrosion inhibitor Furylalkonium chlorid (the yield of these two steps is 85%).

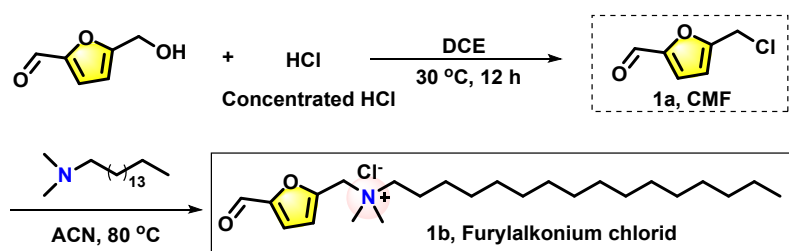

**Scheme S1** The synthetic route and structural formula of **1a** and Furylalkonium chlorid.

## Section C. Supporting Figures

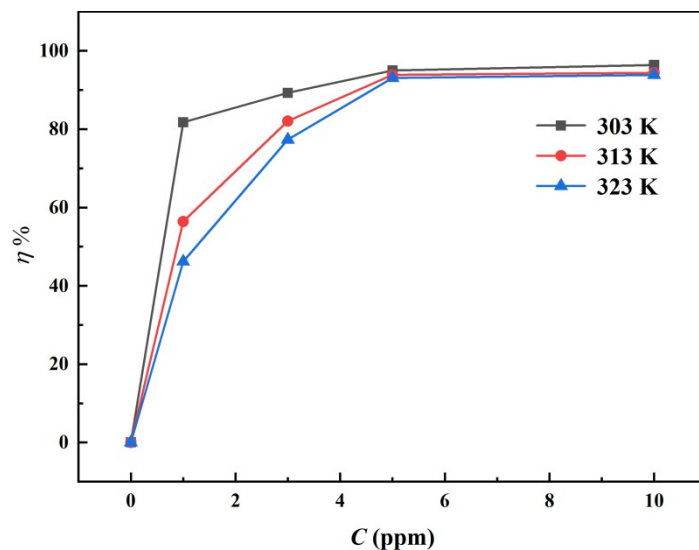

**Figure S1.** (a) The corrosion inhibition efficiency for the mild steel in 0.5 M HCl containing different concentrations of inhibitor Furylalkonium chlorid with at 303 K, 313 K and 323 K, respectively.

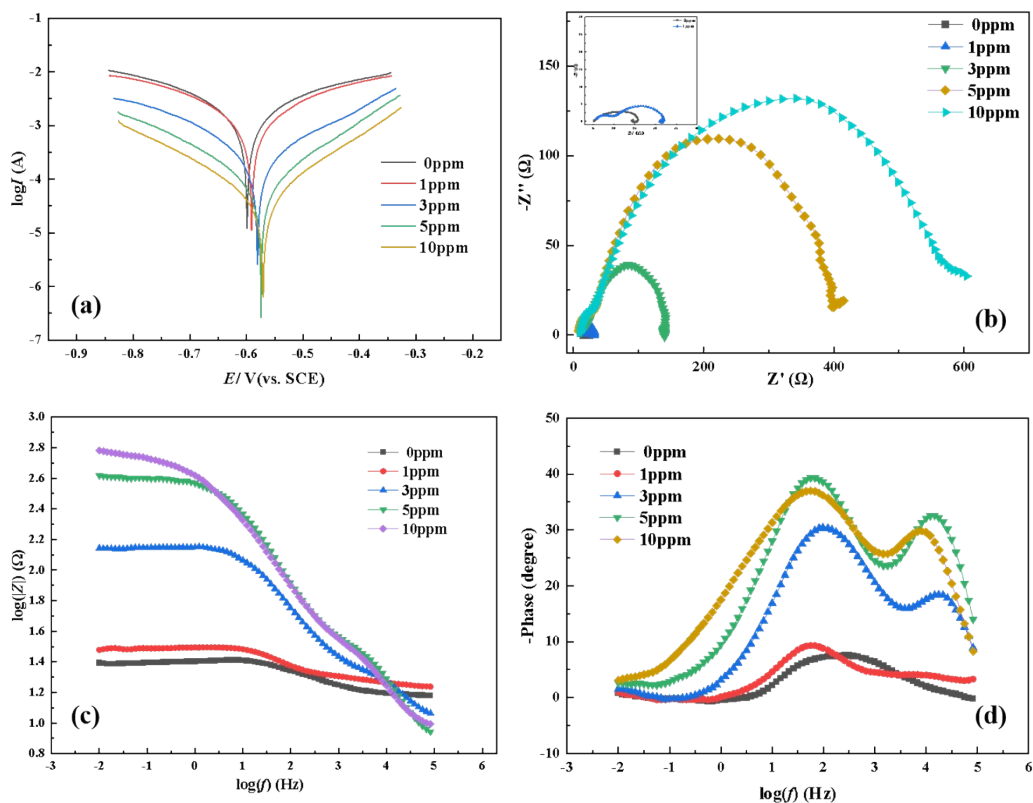

**Figure S2.** Potentiodynamic polarization curves (a), Nyquist plots (b), and Bode plots (c and d) for mild steel in 0.5 M HCl solution with different concentrations of Furylalkonium chlorid at 303K.

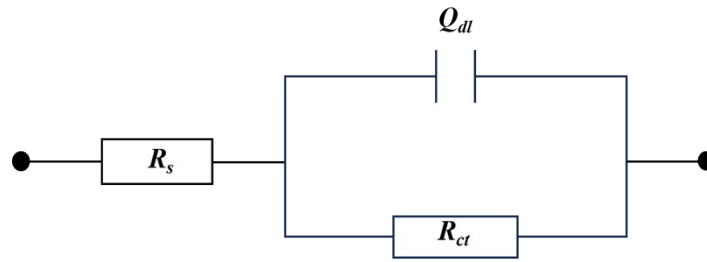

**Figure S3.** Simulated equivalent circuit.

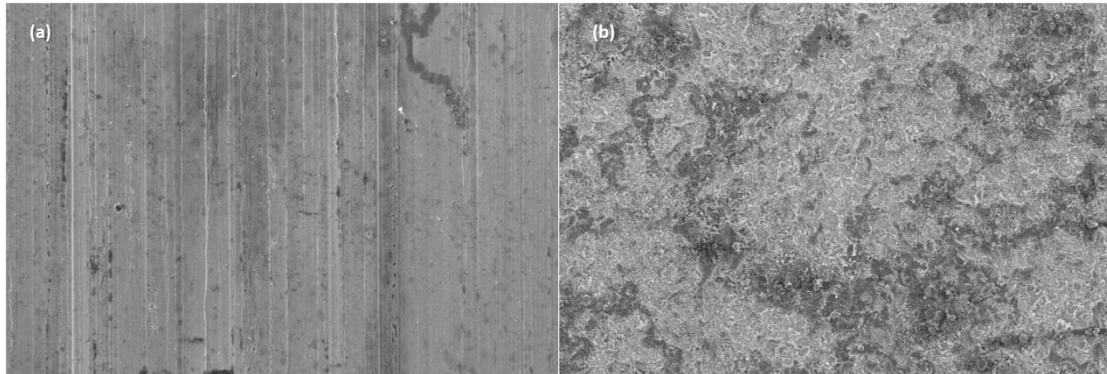

**Figure S4** SEM images of the mild steel surface after corrosion in 0.5 M HCl solution with 10 ppm Furylalkonium chlorid (a), and without inhibitor for 4 h at 303 K (b).

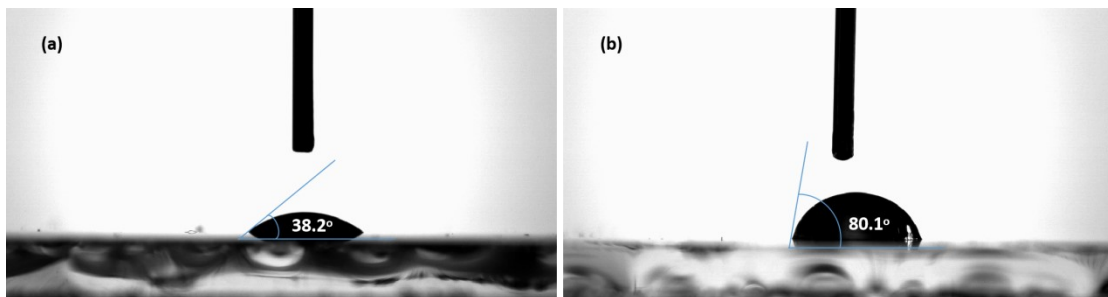

**Figure S5** WCA images of glass surface (immersed in water) without inhibitor (a), and with 0.75 M inhibitor (b).

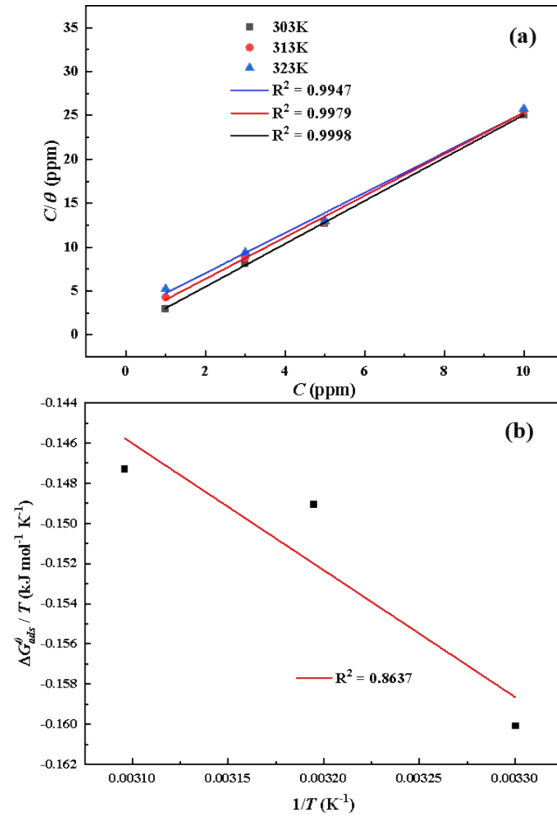

**Figure S6** (a) Langmuir adsorption isotherm plots of the inhibitor Furylalkonium chlorid on metal steel surface; (b) Curves of  $\Delta G^0_{ads}/T$  versus  $1/T$ .

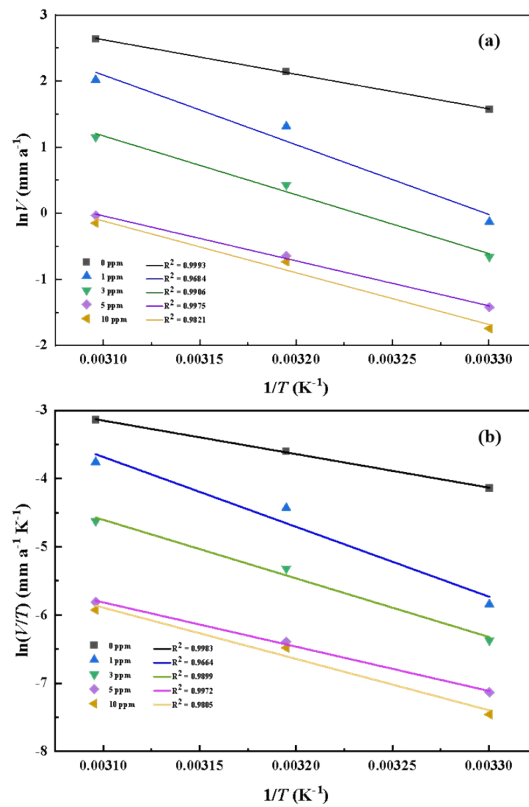

**Figure S7** Arrhenius plots (a) and transition state plots (b) for metal steel in 0.5 M HCl solution with different concentrations of Furylalkonium chlorid.

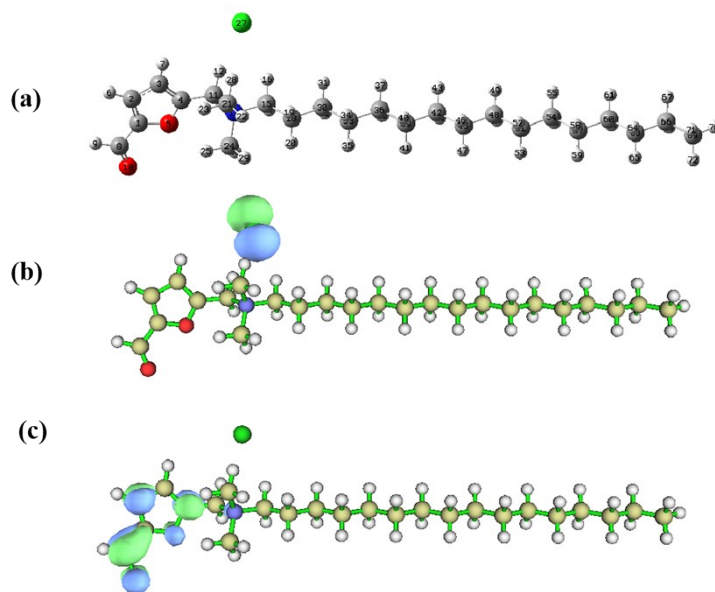

**Figure S8** Optimized geometric structure (a) and the distributions of HOMO (b) and LUMO (c) for inhibitor Furylalkonium chlorid.

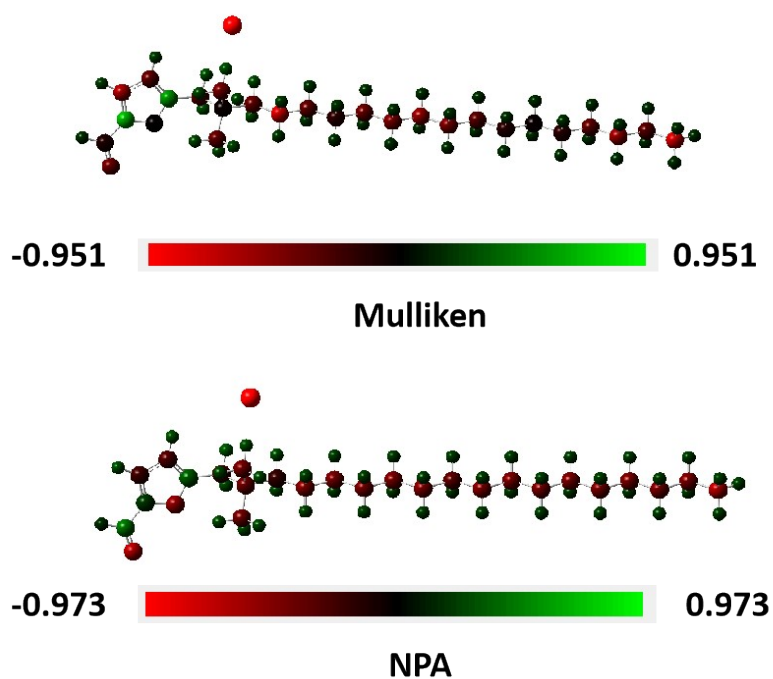

**Figure S9** Mulliken and NPA charge distribution on bio-based inhibitor Furylalkonium chlorid.

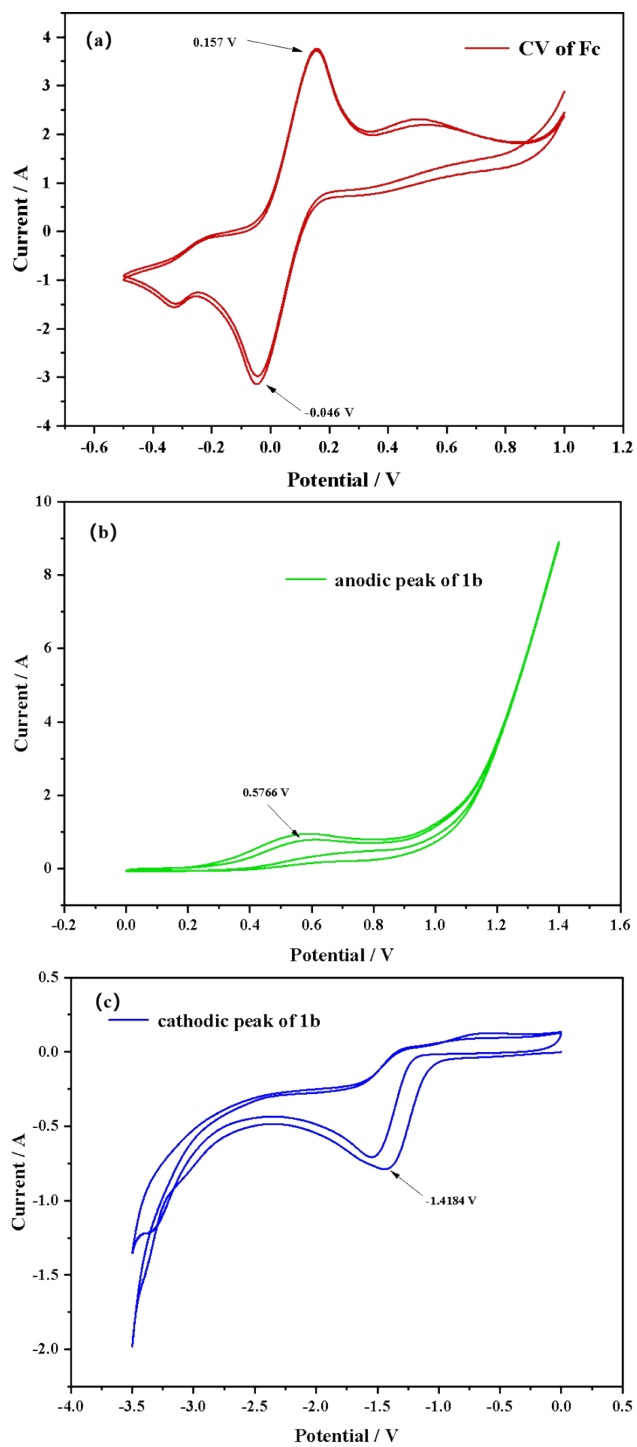

**Figure S10** The cyclic voltammety experiments of ferrocene (Fc) and bio-based inhibitor Furylalkonium chlorid.



## Section D. Supporting Tables

**Table S1** Weight loss results of mild steel in 1 M HCl without and with Furylalkonium chlorid at 30°C.

| Inhibitor | C (ppm) | $r(\text{mm} \cdot \text{a}^{-1})$ | $\eta\%$ |
|-----------|---------|------------------------------------|----------|
| -         | 0       | 1.9756                             | -        |
| <b>1b</b> | 1       | 0.9656                             | 51.12    |
|           | 3       | 0.4993                             | 74.72    |
|           | 5       | 0.4015                             | 79.67    |
|           | 10      | 0.3142                             | 84.09    |
|           | 20      | 0.2320                             | 88.26    |

**Table S2** Electrochemical parameters for steel specimens in the 0.5 M HCl solution containing different concentrations of Furylalkonium chlorid.

| C (ppm) | $E_{corr}$ (V) | $I_{corr}$ (mA) | $-\beta_c$ (mV dec <sup>-1</sup> ) | $\beta_a$ (mV dec <sup>-1</sup> ) | $\eta_{Tafel}\%$ |
|---------|----------------|-----------------|------------------------------------|-----------------------------------|------------------|
| 0       | -0.5990        | 1.590           | 187.8640                           | 203.3347                          | -                |
| 1       | -0.5905        | 0.7513          | 136.7802                           | 93.6768                           | 52.7             |
| 3       | -0.5803        | 0.2569          | 153.8462                           | 176.5225                          | 83.8             |
| 5       | -0.5907        | 0.0806          | 150.1276                           | 136.3884                          | 94.9             |
| 10      | -0.5701        | 0.0451          | 146.8644                           | 137.5327                          | 99.7             |

**Table S3** The EIS parameters for mild steel in 0.5 M HCl solution with different concentration of Furylalkonium chlorid at 303 K.

| C<br>(ppm) | $R_s$<br>( $\Omega$ ) | $Q_{dl}$                        |        | $R_{ct}$<br>( $\Omega$ ) | $\eta_{Rct}\%$ |
|------------|-----------------------|---------------------------------|--------|--------------------------|----------------|
|            |                       | $Y_0$ ( $\mu\text{F cm}^{-2}$ ) | $n$    |                          |                |
| 0          | 7.679                 | $13.23 \times 10^{-4}$          | 0.6940 | 4.962                    | -              |
| 1          | 17.91                 | $0.1508 \times 10^{-4}$         | 0.6203 | 13.53                    | 63.3           |

|    |       |                        |        |       |      |
|----|-------|------------------------|--------|-------|------|
| 3  | 12.79 | $4.308 \times 10^{-4}$ | 0.5478 | 138.2 | 96.4 |
| 5  | 6.602 | $4.038 \times 10^{-4}$ | 0.4827 | 459.3 | 98.9 |
| 10 | 7.375 | $5.353 \times 10^{-4}$ | 0.4697 | 658.9 | 99.2 |

**Table S4** Thermodynamic parameters for the adsorption of Furylalkonium chlorid on metal steel.

| $T$ | $K$                   | $\Delta G_{ads}^0$      | $\Delta H_{ads}^0$      | $\Delta S_{ads}^0$                     |
|-----|-----------------------|-------------------------|-------------------------|----------------------------------------|
| (K) | (mol <sup>-1</sup> L) | (kJ mol <sup>-1</sup> ) | (kJ mol <sup>-1</sup> ) | (J mol <sup>-1</sup> K <sup>-1</sup> ) |
| 303 | $4.1506 \times 10^6$  | -48.5064                |                         | -48.0262                               |
| 313 | $1.1008 \times 10^6$  | -46.6534                | -63.0584                | -52.4119                               |
| 323 | $0.8911 \times 10^6$  | -47.5764                |                         | -47.9318                               |

**Table S5** Activation parameters for mild steel in 0.5 M HCl solution with different concentrations of Furylalkonium chlorid.

| $C$ (ppm) | $E_a$ (kJ mol <sup>-1</sup> ) | $\Delta H^\ddagger$ (kJ mol <sup>-1</sup> ) | $\Delta S^\ddagger$ (kJ mol <sup>-1</sup> K <sup>-1</sup> ) |
|-----------|-------------------------------|---------------------------------------------|-------------------------------------------------------------|
| 0         | 43.4002                       | 40.80013                                    | -174.75397                                                  |
| 1         | 87.6674                       | 85.06732                                    | -41.96085                                                   |
| 3         | 73.9497                       | 71.34965                                    | -92.14341                                                   |
| 5         | 56.5101                       | 53.91                                       | -156.27137                                                  |
| 10        | 65.0541                       | 62.45407                                    | -130.42564                                                  |

**Table S6** The HOMO and LUMO energies of Furylalkonium chlorid obtained from CV experiments and DFT quantum chemical calculations.

| Method | $E_{HOMO}$ (eV) | $E_{LUMO}$ (eV) | $\Delta E$ (eV) |
|--------|-----------------|-----------------|-----------------|
| DFT    | -6.82           | -2.53           | 4.29            |
| CV     | -5.32           | -3.33           | 1.99            |

**Table S7** Mullikan charge and NPA charge of the various atoms present in **1b**.

|       | NPA       | Mulliken  |
|-------|-----------|-----------|
| Atoms | <b>1b</b> | <b>1b</b> |

---

|      |          |          |
|------|----------|----------|
| 1C   | 0.17843  | 0.632827 |
| 2C   | -0.19872 | -0.51097 |
| 3C   | -0.2585  | -0.19606 |
| 4C   | 0.29952  | 0.313799 |
| 5O   | -0.45211 | -0.02475 |
| 6H   | 0.24849  | 0.177502 |
| 7H   | 0.25128  | 0.168944 |
| 8C   | 0.37734  | -0.12815 |
| 9H   | 0.14474  | 0.144434 |
| 10O  | -0.57818 | -0.33486 |
| 11C  | -0.23296 | -0.29151 |
| 12H  | 0.27984  | 0.248792 |
| 13H  | 0.2474   | 0.252879 |
| 14N  | -0.33746 | -0.14243 |
| 15C  | -0.1649  | -0.28024 |
| 16H  | 0.24336  | 0.187143 |
| 17H  | 0.21923  | 0.196362 |
| 18C  | -0.4087  | -0.66139 |
| 19H  | 0.2108   | 0.182688 |
| 20H  | 0.20911  | 0.160237 |
| 21C  | -0.3664  | -0.30302 |
| 22H  | 0.2246   | 0.211387 |
| 23H  | 0.22518  | 0.20636  |
| 24C  | -0.3561  | -0.31923 |
| 25H  | 0.22813  | 0.212522 |
| 26H  | 0.22711  | 0.219303 |
| 27Cl | -0.97273 | -0.8962  |

|     |          |          |
|-----|----------|----------|
| 28H | 0.24536  | 0.215044 |
| 29H | 0.22696  | 0.209228 |
| 30C | -0.37467 | -0.02267 |
| 31H | 0.1994   | 0.165951 |
| 32H | 0.19755  | 0.147729 |
| 33C | -0.37677 | -0.22589 |
| 34H | 0.19292  | 0.149747 |
| 35H | 0.1924   | 0.147003 |
| 36C | -0.38276 | -0.31792 |
| 37H | 0.19049  | 0.146857 |
| 38H | 0.19001  | 0.145276 |
| 39C | -0.40206 | -0.37817 |
| 40H | 0.18884  | 0.144359 |
| 41H | 0.1886   | 0.143566 |
| 42C | -0.2904  | -0.45884 |
| 43H | 0.18457  | 0.144152 |
| 44H | 0.18435  | 0.143332 |
| 45C | -0.40206 | -0.37676 |
| 46H | 0.18809  | 0.143644 |
| 47H | 0.18796  | 0.143077 |
| 48C | -0.38248 | -0.27196 |
| 49H | 0.18827  | 0.143459 |
| 50H | 0.18814  | 0.143007 |
| 51C | -0.37762 | -0.12587 |
| 52H | 0.18841  | 0.143118 |
| 53H | 0.18833  | 0.14288  |
| 54C | -0.37723 | -0.03052 |

|     |          |          |
|-----|----------|----------|
| 55H | 0.1885   | 0.142756 |
| 56H | 0.18842  | 0.142501 |
| 57C | -0.37709 | -0.11742 |
| 58H | 0.18853  | 0.142581 |
| 59H | 0.18847  | 0.142505 |
| 60C | -0.37805 | -0.29749 |
| 61H | 0.18865  | 0.142106 |
| 62H | 0.18859  | 0.141945 |
| 63C | -0.37996 | -0.47061 |
| 64H | 0.18829  | 0.140528 |
| 65H | 0.18825  | 0.140503 |
| 66C | -0.38322 | -0.31181 |
| 67H | 0.1882   | 0.137999 |
| 68H | 0.18817  | 0.1379   |
| 69C | -0.57542 | -0.59769 |
| 70H | 0.19962  | 0.137746 |
| 71H | 0.19339  | 0.133368 |
| 72H | 0.19337  | 0.133362 |

---

Section E.  $^1\text{H}$  NMR,  $^{13}\text{C}$  NMR and HRMS Spectra of bio-based corrosion inhibitors

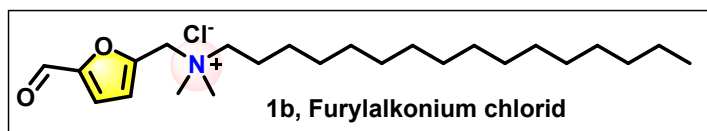

**The bio-based corrosion inhibitor Furylalkonium chlorid:** White solid; 89% yield;  $^1\text{H}$  NMR (400 MHz,  $\text{CDCl}_3$ )  $\delta$  9.68 (s, 1H), 7.41 (d,  $J = 3.2$  Hz, 1H), 7.29 (d,  $J = 3.2$  Hz, 1H), 5.42 (s, 2H), 3.52-3.50 (m, 2H), 3.40 (s, 6H), 1.25 (s, 28H), 0.87 (t,  $J = 6.8$  Hz, 3H);  $^{13}\text{C}$  NMR (100 MHz,  $\text{CDCl}_3$ )  $\delta$  177.79, 154.18, 148.39, 122.05, 119.89, 64.97, 59.24, 51.05, 32.01, 29.78, 29.75, 29.70, 29.57, 29.50, 29.45, 29.28, 26.40, 23.03, 22.77, 14.21. HRMS  $m/z$  (ESI) calcd for  $\text{C}_{24}\text{H}_{44}\text{NO}_2^+$  (M-Cl) $^+$  378.3367, found 378.3408.
